# Supplementary material for: Clinical presentation of childhood leukaemia: a systematic review and meta-analysis
Source: HighWire-hosted journal article supplement (doi:10.1136/archdischild-2016-311251), 2016-09-19
Supplement: archdischild-2016-311251supp.pdf [file archdischild-2016-311251supp.pdf]

## Supplement

### Presentation of childhood leukemia: systematic review and meta-analysis

Rachel T Clarke<sup>1</sup>, Chris Mitchell<sup>2</sup>, Bob Phillips<sup>3</sup>, Ann Van den Bruel<sup>1</sup>, Clare Bankhead<sup>1</sup>, Matthew J Thompson<sup>1</sup>

#### eSearch: Electronic database search strategy

##### A. Medline search strategy for leukaemia (last conducted Dec 2014)

1. leukemia/ or exp leukemia, lymphoid/ or exp leukemia, myeloid/
2. (leukemia\* or leukaemia\*).tw.
3. 1 or 2
4. (sign or signs or symptom\*).tw.
5. ((clinical or biological or physical) adj5 (feature\* or present\* or characteristic\* or manifestation\*)).tw.
6. (present\* adj5 (feature\* or characteristic\*)).tw.
7. present\*.ti.
8. 4 or 5 or 6 or 7
9. 3 and 8
10. (child\* or infan\* or toddler\* or adolescent\* or teenage\* or pediatric\* or paediatric\*).tw.
11. adolescent/ or exp child/ or exp infant/
12. 11 or 10
13. 9 and 12

##### B. Medline search strategy for cancer (last conducted Dec 2014):

1. (cancer\* or neoplasm\* or tumor\* or tumour\* or malignan\*).ti.
2. (child\* or adolescent\* or teenage\* or infan\* or toddler\* or pediatric\* or paediatric\*).ti.
3. 1 and 2
4. (sign or signs or symptom\*).tw.
5. ((clinical or biological or physical) adj5 (feature\* or present\* or characteristic\* or manifestation\*)).tw.
6. (present\* adj5 (feature\* or characteristic\*)).tw.
7. present\*.ti.
8. 4 or 5 or 6 or 7
9. 8 and 3

##### C. Embase search strategy for leukaemia (last conducted Dec 2014)

1. exp Leukemia/

2. (leukemia\* or leukaemia\*).tw.
3. 1 or 2
4. (sign or signs or symptom\*).tw.
5. ((clinical or biological or physical) adj5 (feature\* or present\* or characteristic\* or manifestation\*)).tw.
6. (present\* adj5 (feature\* or characteristic\*)).tw.
7. clinical feature/ or symptom/
8. present\*.ti.
9. 4 or 5 or 6 or 7 or 8
10. (child\* or infan\* or toddler\* or adolescen\* or teenage\* or pediatric\* or paediatric\*).tw.
11. groups by age/ or adolescent/ or child/ or preschool child/ or school child/ or infant/
12. 11 or 10
13. 9 and 12 and 3

**D. Embase search strategy for cancer (last conducted Dec 2014)**

1. exp Cancer/
2. cancer\*.tw.
3. 1 or 2
4. (sign or signs or symptom\*).tw.
5. ((clinical or biological or physical) adj5 (feature\* or present\* or characteristic\* or manifestation\*)).tw.
6. (present\* adj5 (feature\* or characteristic\*)).tw.
7. clinical feature/ or symptom/
8. present\*.ti.
9. 4 or 5 or 6 or 7 or 8
10. (child\* or infan\* or toddler\* or adolescen\* or teenage\* or pediatric\* or paediatric\*).tw.
11. groups by age/ or adolescent/ or child/ or preschool child/ or school child/ or infant/
12. 11 or 10
13. 9 and 12 and 3

**eTable 1: Quality assessment of studies meeting eligibility criteria for potential inclusion**

| STUDY                    | 1. CASE DEFINITION                     |                         | 2. CASE SELECTION                                               |                        |                                                  |                        | 3. DATA SELECTION                           |                                                  |                        | INCLUDE PAPER? |
|--------------------------|----------------------------------------|-------------------------|-----------------------------------------------------------------|------------------------|--------------------------------------------------|------------------------|---------------------------------------------|--------------------------------------------------|------------------------|----------------|
|                          | Adequate defn? (=bone marrow criteria) | Overall acceptable /not | Clear baseline characteristics? (eg. participants' age and sex) | Representative cohort? | Adequate ascertainment? (eg. consecutive cases?) | Overall acceptable/not | Standardised collection? (=use of proforma) | Objective measurement? (eg. ultrasound findings) | Overall acceptable/not |                |
| Ali Al-Barazanchi (2005) | Y                                      | Y                       | Y                                                               | Unclear                | Unclear                                          | <b>N</b>               | Unclear                                     | Unclear                                          | <b>N</b>               | <b>N</b>       |
| Arico (1993)             | Y                                      | Y                       | Y                                                               | Y                      | Unclear                                          | Y                      | Unclear                                     | Unclear                                          | <b>N</b>               | <b>Y</b>       |
| Arya (1995)              | Y                                      | Y                       | Y                                                               | Y                      | Y                                                | Y                      | Unclear                                     | Y                                                | Y                      | <b>Y</b>       |
| Atay (2005)              | Y                                      | Y                       | Y                                                               | Y                      | Unclear                                          | Y                      | Unclear                                     | Unclear                                          | <b>N</b>               | <b>Y</b>       |
| Bernbeck (2009)          | Y                                      | Y                       | Y                                                               | Y                      | Y                                                | Y                      | Unclear                                     | Y                                                | Y                      | <b>Y</b>       |
| Biswas (2009)            | Y                                      | Y                       | Y                                                               | Y                      | Unclear                                          | Y                      | Unclear                                     | Y                                                | Y                      | <b>Y</b>       |
| Castro-Malaspina (1983)  | Y                                      | Y                       | Y                                                               | Y                      | Y                                                | Y                      | Unclear                                     | Y                                                | Y                      | <b>Y</b>       |
| Castro-Malaspina (1984)  | Y                                      | Y                       | Y                                                               | Y                      | Y                                                | Y                      | Unclear                                     | Y                                                | Y                      | <b>Y</b>       |
| Chan (1981)              | Y                                      | Y                       | Y                                                               | Y                      | Unclear                                          | Y                      | Unclear                                     | Unclear                                          | Y                      | <b>Y</b>       |
| Chang (2003)             | Y                                      | Y                       | Y                                                               | Y                      | Unclear                                          | Y                      | Unclear                                     | Unclear                                          | Y                      | <b>Y</b>       |
| Chang (2004)             | Y                                      | Y                       | Y                                                               | Y                      | Unclear                                          | Y                      | Unclear                                     | Y                                                | Y                      | <b>Y</b>       |
| Choi (1976)              | Y                                      | Y                       | Y                                                               | Y                      | Y                                                | Y                      | Unclear                                     | Y                                                | Y                      | <b>Y</b>       |
| Da Costa Moraes (2008)   | Y                                      | Y                       | Y                                                               | Y                      | Y                                                | Y                      | Unclear                                     | Unclear                                          | <b>N</b>               | <b>Y</b>       |
| Das (1973)               | Y                                      | Y                       | Y                                                               | Y                      | Unclear                                          | Y                      | Unclear                                     | Unclear                                          | <b>N</b>               | <b>Y</b>       |
| Drozynska (2002)         | Y                                      | Y                       | Y                                                               | Y                      | Unclear                                          | Y                      | Unclear                                     | Y                                                | Y                      | <b>Y</b>       |
| Garcia Calatayud (2003)  | Y                                      | Y                       | Y                                                               | Y                      | Unclear                                          | Y                      | Unclear                                     | Unclear                                          | <b>N</b>               | <b>Y</b>       |
| Grimes (2007)            | N                                      | <b>N</b>                | Y                                                               | Y                      | Y                                                | Y                      | Unclear                                     | Unclear                                          | <b>N</b>               | <b>N</b>       |

|                         |   |   |   |   |         |   |         |         |   |   |
|-------------------------|---|---|---|---|---------|---|---------|---------|---|---|
| Hasanbegovic (2006)     | Y | Y | Y | Y | Unclear | Y | Unclear | Unclear | N | Y |
| Hassan (1992)           | Y | Y | Y | Y | Y       | Y | Y       | Unclear | Y | Y |
| Karimi (2008)           | Y | Y | Y | Y | Unclear | Y | Y       | Y       | Y | Y |
| Klinowska (1992)        | Y | Y | Y | Y | Unclear | Y | Unclear | Unclear | N | Y |
| La Grutta (1980)        | Y | Y | Y | Y | Unclear | Y | Y       | Y       | Y | Y |
| Liu (2010)              | Y | Y | Y | Y | Unclear | Y | Unclear | Y       | Y | Y |
| Ma (1997)               | Y | Y | Y | Y | Y       | Y | Unclear | Unclear | N | Y |
| Meighan (1963)          | Y | Y | Y | Y | Y       | Y | Unclear | Y       | Y | Y |
| Meighan (1964)          | Y | Y | Y | Y | Y       | Y | Unclear | Unclear | N | Y |
| Millot (2005)           | Y | Y | Y | Y | Y       | Y | Unclear | Y       | Y | Y |
| Owen (1992)             | Y | Y | Y | Y | Y       | Y | Unclear | Y       | Y | Y |
| Paredes-Aguilera (2003) | Y | Y | Y | Y | Y       | Y | Unclear | Unclear | N | Y |
| Rajarajeswari (1980)    | Y | Y | Y | Y | Unclear | Y | Unclear | Unclear | N | Y |
| Revesz (1985)           | Y | Y | Y | Y | Y       | Y | Unclear | Unclear | N | Y |
| Robazzi (2007)          | Y | Y | Y | Y | Unclear | Y | Unclear | Unclear | N | Y |
| Sinigaglia (2008)       | Y | Y | Y | Y | Y       | Y | Unclear | Unclear | Y | Y |
| Thulesius (2000)        | Y | Y | Y | Y | Y       | Y | Unclear | Unclear | N | Y |
| Zahid (1996)            | Y | Y | Y | Y | Unclear | Y | Y       | Unclear | Y | Y |

**eTable 2: Signs and symptoms in children with leukemia with <10% prevalence**

| Feature               | Pooled proportion (%) | (95% CI) | No. of participants | No. of studies |
|-----------------------|-----------------------|----------|---------------------|----------------|
| Zanthomata            | 9                     | (3 - 20) | 9                   | 3              |
| Papilloedema          | 8                     | n/a      | 3                   | 1              |
| Melaena               | 7                     | n/a      | 5                   | 1              |
| Nausea/vomiting       | 7                     | (0 - 17) | 7                   | 2              |
| Asymptomatic          | 6                     | (3 - 10) | 24                  | 6              |
| Convulsions           | 6                     | n/a      | 6                   | 1              |
| Cough                 | 6                     | (0 - 14) | 8                   | 3              |
| Heart failure         | 6                     | (3 - 11) | 3                   | 2              |
| Jaundice              | 6                     | (0 - 14) | 9                   | 2              |
| CNS* symptoms         | 5                     | (2 - 8)  | 36                  | 4              |
| Headache              | 5                     | (3 - 7)  | 27                  | 7              |
| Menorrhagia           | 5                     | n/a      | 9                   | 1              |
| Night sweats          | 5                     | n/a      | 9                   | 1              |
| Chest pain            | 5                     | (2 - 8)  | 11                  | 2              |
| Gum hypertrophy       | 5                     | (1 - 10) | 23                  | 3              |
| Neck swelling         | 5                     | (0 - 11) | 15                  | 3              |
| Collapsed vertebra    | 4                     | n/a      | 1                   | 1              |
| Mediastinal mass      | 4                     | (2 - 5)  | 21                  | 4              |
| Sternal tenderness    | 4                     | n/a      | 3                   | 1              |
| SVCO**                | 4                     | n/a      | 10                  | 1              |
| Café au lait spots    | 4                     | (3-12)   | 3                   | 2              |
| Diarrhoea             | 4                     | (0 - 8)  | 10                  | 3              |
| Back pain             | 3                     | n/a      | 1                   | 1              |
| Erythema nodosum      | 3                     | n/a      | 1                   | 1              |
| Paraplegia            | 3                     | n/a      | 2                   | 1              |
| Priapism              | 3                     | (0 - 5)  | 4                   | 4              |
| Visual disturbance    | 3                     | n/a      | 1                   | 1              |
| Dizziness             | 3                     | (1 - 4)  | 12                  | 2              |
| Haematuria            | 3                     | (0 - 6)  | 6                   | 2              |
| Amenorrhoea           | 2                     | n/a      | 1                   | 1              |
| Ascites               | 2                     | (0 - 4)  | 7                   | 4              |
| Fracture              | 2                     | n/a      | 1                   | 1              |
| Hilar lymphadenopathy | 2                     | n/a      | 8                   | 1              |

|                           |   |          |    |   |
|---------------------------|---|----------|----|---|
| Mass                      | 2 | n/a      | 1  | 1 |
| Hearing disturbance       | 2 | (1 - 5)  | 2  | 2 |
| Meningism                 | 2 | (0 - 5)  | 11 | 3 |
| Pleural effusion          | 2 | (0 -4)   | 3  | 2 |
| Proptosis                 | 2 | (1 - 4)  | 11 | 3 |
| Bladder dysfunction       | 1 | n/a      | 1  | 1 |
| Forearm masses            | 1 | n/a      | 1  | 1 |
| Haematemesis              | 1 | n/a      | 1  | 1 |
| Ovarian mass              | 1 | n/a      | 2  | 1 |
| CN*** palsy               | 1 | (0 - 30) | 4  | 2 |
| Mandibular swelling       | 1 | (0 - 3)  | 6  | 3 |
| Testicular manifestations | 1 | (1 - 2)  | 3  | 2 |
| Osteomyelitis             | 0 | n/a      | 1  | 1 |
| Pericardial effusion      | 0 | n/a      | 1  | 1 |
| Pericarditis              | 0 | n/a      | 1  | 1 |
| Refusal to walk           | 0 | n/a      | 2  | 1 |
| Renal involvement         | 0 | n/a      | 1  | 1 |

\*Central nervous system

\*\* Superior vena cava  
obstruction

\*\*\* Cranial nerve

**eTable 3: Subgroup analyses in children with leukemia by leukemia type, income status, and year of study**

| Presenting feature                   | OVERALL                    |              | SUBGROUP ONE: INCOME       |              |                            |              | SUBGROUP TWO: AGE          |              |                            |              | SUBGROUP THREE: LEUKEMIA TYPE |              |                            |              |
|--------------------------------------|----------------------------|--------------|----------------------------|--------------|----------------------------|--------------|----------------------------|--------------|----------------------------|--------------|-------------------------------|--------------|----------------------------|--------------|
|                                      | Pooled proportion (95% CI) | I2 (p-value) | 1. High income             |              | 2. Middle/low income       |              | 1. 1990 - current          |              | 2. > 1990                  |              | 1. Acute                      |              | 2. Chronic                 |              |
|                                      |                            |              | Pooled proportion (95% CI) | I2 (p-value) | Pooled proportion (95% CI)    | I2 (p-value) | Pooled proportion (95% CI) | I2 (p-value) |
| <b>Infiltrative (organomegalies)</b> |                            |              |                            |              |                            |              |                            |              |                            |              |                               |              |                            |              |
| Hepatomegaly                         | 64 (53-75)                 | 98 (0)       | 63 (49 - 77)               | 96 (0)       | 65 (49 - 81)               | 98 (0)       | 64 (50 - 77)               | 97 (0)       | 65 (50 - 79)               | 97 (0)       | 71 (59 - 82)                  | 95 (0)       | 54 (28 - 79)               | 95 (0)       |
| Splenomegaly                         | 61 (48-73)                 | 98 (0)       | 76 (67 - 85)               | 93 (0)       | 51 (36 - 64)               | 98 (0)       | 60 (43 - 77)               | 98 (0)       | 62 (42 - 83)               | 99 (0)       | 56 (40 - 73)                  | 98 (0)       | 77 (62 - 92)               | 86 (0)       |
| Hepatosplenomegaly                   | 42 (24 - 100)              | 100 (0)      | 42 (0 - 100)               | 100 (0)      | n/a                        | n/a          | n/a                        | n/a          | n/a                        | n/a          | 42 (0 - 100)                  | 100 (0)      | n/a                        | n/a          |
| Lymphadenopathy                      | 41 (32 - 51)               | 97 (0)       | 36 (22 - 50)               | 98 (0)       | 47 (37 - 58)               | 93 (0)       | 45 (33 - 57)               | 96 (0)       | 35 (20 - 50)               | 98 (0)       | 52 (42 - 62)                  | 92 (0)       | 26 (7 - 46)                | 93 (0)       |
| <b>Haemorrhagic</b>                  |                            |              |                            |              |                            |              |                            |              |                            |              |                               |              |                            |              |
| Bruising                             | 52 (37 - 66)               | 20 (0.27)    | n/a                        | n/a          | n/a                        | n/a          | n/a                        | n/a          | n/a                        | n/a          | 52 (37 - 66)                  | 20 (0.27)    | n/a                        | n/a          |
| Bruising/petechiae                   | 42 (36 - 49)               | 0 (0.57)     | n/a                        | n/a          | 42 (36 - 49)               | 0 (0.57)     | n/a                        | n/a          | n/a                        | n/a          | 42 (36 - 49)                  | 0 (0.57)     | n/a                        | n/a          |
| Bleeding tendency                    | 38 (30 - 46)               | 90 (0)       | 33 (23 - 43)               | 85 (0)       | 42 (29 - 56)               | 93 (0)       | 33 (25 - 40)               | 79 (0)       | 47 (38 - 56)               | 81 (0)       | 48 (34 - 61)                  | 88 (0)       | 27 (19 - 35)               | 37 (0.16)    |
| Cutaneous/mucosal bleeding           |                            |              | n/a                        | n/a          | n/a                        | n/a          | n/a                        | n/a          | n/a                        | n/a          | n/a                           | n/a          | n/a                        | n/a          |
| Cutaneous bleeding                   | 26 (14 - 38)               | 92 (0)       | 26 (14 - 38)               | 92 (0)       | n/a                        | n/a          | n/a                        | n/a          | 28 (8 - 48)                | 96 (0)       | 26 (14 - 38)                  | 92 (0)       | n/a                        | n/a          |
| Petechiae/purpura                    | 25 (14 - 37)               | 92 (0)       | 25 (3 - 47)                | 96 (0)       | 25 (13 - 38)               | 83 (0)       | 23 (10 - 35)               | 91 (0)       | 34 (13 - 55)               | 91 (0)       | 30 (19 - 40)                  | 85 (0)       | 6 (0 - 17)                 | 39 (0.2)     |
| Mucosal bleeding (e.g. gums)         | 25 (16 - 34)               | 91 (0)       | 15 (9 - 21)                | 75 (0.01)    | 38 (19 - 57)               | 89 (0)       | 34 (16 - 53)               | 91 (0)       | n/a                        | n/a          | 25 (6 - 34)                   | 91 (0)       | n/a                        | n/a          |
| Epistaxis                            | 10 (2 - 18)                | 48 (0.15)    | n/a                        | n/a          | 10 (2 - 18)                | 48 (0.15)    | 10 (2 - 18)                | 48 (0.15)    | n/a                        | n/a          | 11 (0 - 23)                   | 74 (0.05)    | n/a                        | n/a          |
| <b>Infective</b>                     |                            |              |                            |              |                            |              |                            |              |                            |              |                               |              |                            |              |
| Fever                                | 53 (45-62)                 | 97 (0)       | 37 (26 - 47)               | 95 (0.04)    | 70 (62 - 77)               | 90 (0)       | 37 (26 - 48)               | 95 (0)       | 70 (62 - 77)               | 90 (0)       | 62 (51 - 73)                  | 95 (0)       | 31 (13 - 49)               | 91 (0)       |
| Recurrent infections                 | 49 (16 - 81)               | 99 (0)       | 48 (12 - 85)               | 99 (0)       | n/a                        | n/a          | 61 (55 - 68)               | 96 (0)       | 30 (0 - 84)                | 98 (0)       | 49 (16 - 81)                  | 99 (0)       | n/a                        | n/a          |
| Respiratory symptoms                 | 22 (1 - 43)                | 97 (0)       | 22 (1 - 43)                | 97 (0)       | n/a                        | n/a          | 24 (0 - 72)                | 95 (0)       | n/a                        | n/a          | 22 (1 - 43)                   | 97 (0)       | n/a                        | n/a          |
| URTI                                 | 20 (9 - 31)                | 85 (0)       | 36 (23 - 49)               | 13 (0.28)    | 12 (1 - 23)                | 86 (0)       | 20 (9 - 31)                | 85 (0)       | n/a                        | n/a          | 6 (0 - 12)                    | n/a          | 19 (0 - 41)                | 74 (0.05)    |
| Sore throat                          | 11 (3 - 25)                | 95 (0)       | 11 (0 - 25)                | 95 (0)       | n/a                        | n/a          | n/a                        | n/a          | 11 (0 - 25)                | 95 (0)       | 11 (0 - 25)                   | 95 (0)       | n/a                        | n/a          |

|                              |              |           |              |           |              |          |              |           |              |           |              |           |              |           |
|------------------------------|--------------|-----------|--------------|-----------|--------------|----------|--------------|-----------|--------------|-----------|--------------|-----------|--------------|-----------|
| <b>Musculoskeletal (MSK)</b> |              |           |              |           |              |          |              |           |              |           |              |           |              |           |
| Limb pain                    | n/a          | n/a       | n/a          | n/a       | n/a          | n/a      | n/a          | n/a       | n/a          | n/a       | n/a          | n/a       | n/a          | n/a       |
| Bone pain                    | 26 (17 - 35) | 97 (0)    | 10 (5 - 15)  | 78 (0)    | 33 (20 - 46) | 97 (0)   | 32 (18 - 45) | 97 (0)    | 15 (7 - 22)  | 89 (0)    | 23 (19 - 26) | 12 (0.34) | 16 (3 - 36)  | 79 (0.03) |
| MSK impairment               | n/a          | n/a       | n/a          | n/a       | n/a          | n/a      | n/a          | n/a       | n/a          | n/a       | n/a          | n/a       | n/a          | n/a       |
| Bone and/or joint pain       | 19 (13 - 25) | 76 (0)    | 17 (9 - 26)  | 83 (0)    | 20 (14 - 25) | 0 (0.43) | 22 (12 - 31) | 76 (0)    | 15 (8 - 22)  | 71 (0.02) | 19 (11 - 28) | 86 (0)    | 19 (8 - 30)  | 55 (0.11) |
| Joint pain                   | 15 (5 - 25)  | 96 (0)    | 19 (11 - 27) | 57 (0.1)  | 13 (0 - 28)  | 98 (0)   | 15 (1 - 29)  | 97 (0)    | 14 (0 - 34)  | 97 (0)    | 21 (0 - 49)  | 98 (0)    | n/a          | n/a       |
| Limp                         | 11 (0 - 21)  | 94 (0.05) | 6 (0 - 12)   | 72 (0.03) | n/a          | n/a      | 11 (0 - 21)  | 94 (0)    | n/a          | n/a       | n/a          | n/a       | n/a          | n/a       |
| <b>Systemic</b>              |              |           |              |           |              |          |              |           |              |           |              |           |              |           |
| Pallor                       | 54 (40-69)   | 99 (0)    | 34 (15 - 52) | 98 (0)    | 73 (61 - 85) | 96 (0)   | 63 (50 - 75) | 96 (0)    | 42 (19 - 64) | 99 (0)    | 60 (44 - 76) | 97 (0)    | 57 (0 - 100) | 99 (0)    |
| Fatigue                      | 46 (28 - 64) | 97 (0)    | 39 (8 - 71)  | 98 (0)    | 47 (0 - 94)  | 98 (0)   | 43 (23 - 63) | 97 (0)    | n/a          | n/a       | 42 (18 - 66) | 98 (0)    | n/a          | n/a       |
| Malaise/fatigue              | 31 (7 - 56)  | 97 (0)    | 41 (11 - 70) | 93 (0)    | n/a          | n/a      | n/a          | n/a       | 37 (0 - 77)  | 97 (0)    | 32 (0 - 87)  | 98 (0)    | 31 (0 - 64)  | 92 (0)    |
| Weakness/fatigue             | 27 (18 - 36) | 94 (0)    | 26 (18 - 34) | 84 (0)    | 29 (9 - 50)  | 97 (0)   | 42 (20 - 63) | 95 (0)    | 15 (7 - 23)  | 87 (0)    | 25 (16 - 33) | n/a       | n/a          | n/a       |
| Oedema                       | 15 (10 - 20) | 0 (0.58)  | n/a          | n/a       | 15 (10 - 21) | 0 (0.51) | 20 (0 - 45)  | 17 (0.27) | 15 (10 - 22) | 0         | 14 (7 - 20)  | 0 (0.6)   | n/a          | n/a       |
| <b>Gastro-intestinal</b>     |              |           |              |           |              |          |              |           |              |           |              |           |              |           |
| Anorexia/weight loss         | 29 (16 - 42) | 97 (0)    | 22 (15 - 28) | 77 (0)    | 43 (14 - 73) | 98       | 24 (15 - 33) | 90 (0)    | 38 (4 - 73)  | 99 (0)    | 31 (15 - 48) | 98        | 19 (13 - 26) | 0 (0.65)  |
| Abdominal symptoms           | 20 (9 - 31)  | 89 (0)    | 20 (9 - 31)  | 89 (0)    | n/a          | n/a      | 38 (24 - 52) | 83 (0)    | 14 (5 - 23)  | 89 (0)    | 21 (3 - 34)  | 82        | 38 (24 - 52) | 0 (0.81)  |
| Abdominal pain               | 12 (7 - 16)  | 49 (0)    | 15 (7 - 24)  | 64 (0.02) | 10 (6 - 15)  | 0        | 15 (10 - 21) | 14 (0.33) | 8 (5 - 11)   | 12 (0.29) | 11 (7 - 15)  | 0         | n/a          | n/a       |
| Abdominal distension         | 11 (3 - 18)  | 87 (0.1)  | 8 (0 - 16)   | 89 (0)    | 12 (3 - 21)  | 87       | 8 (1 - 15)   | 82 (0)    | n/a          | n/a       | 30 (0 - 84)  | 92        | 9 (1 - 16)   | 0 (0.43)  |
| <b>Cutaneous</b>             |              |           |              |           |              |          |              |           |              |           |              |           |              |           |
| Rash                         | 35 (22 - 48) | 72        | 33 (16 - 49) | 77 (0)    | 43 (25 - 62) | 29       | 41 (27 - 56) | 62 (0.03) | 20 (9 - 31)  | 0 (0.6)   | 31 (19 - 43) | 60        | n/a          | n/a       |
| Pyoderma                     | n/a          | n/a       | n/a          | n/a       | n/a          | n/a      | n/a          | n/a       | n/a          | n/a       | n/a          | n/a       | n/a          | n/a       |
| Nodules                      | n/a          | n/a       | n/a          | n/a       | n/a          | n/a      | n/a          | n/a       | n/a          | n/a       | n/a          | n/a       | n/a          | n/a       |
| Skin infiltration            | 12 (11 - 36) | 97        | n/a          | n/a       | n/a          | n/a      | n/a          | n/a       | n/a          | n/a       | 12 (0 - 36)  | 97        | n/a          | n/a       |
